# Supplementary material for: Whole-genome-based phylogeny of Bacillus cytotoxicus reveals different clades within the species and provides clues on ecology and evolution
Source: PubMed Central journal article supplement (PMC6374410; doi:10.1038/s41598-018-36254-x), 2019-02-13

Whole-genome-based phylogeny of *Bacillus cytotoxicus* reveals different clades within the species and provides clues on ecology and evolution

Marc J. A. Stevens<sup>1</sup>, Taurai Tasara<sup>1</sup>, Jochen Klumpp<sup>2</sup>, Roger Stephan<sup>1</sup>, Monika Ehling-Schulz<sup>3</sup>,  
Sophia Jöhler<sup>1,\*</sup>

**Supplemental Figure 1:** A) Dynamics of the core genome of 14 *B. cytotoxicus* strains and the formula resulting from curve fitting. B) Dynamics of the pan genome of 14 *B. cytotoxicus* strains.

A)

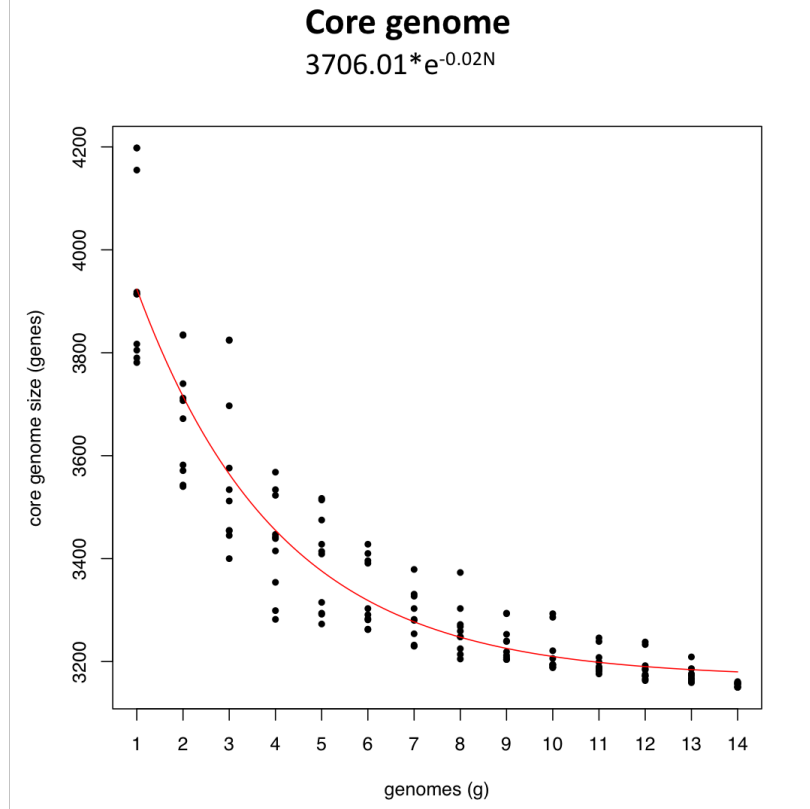

B)

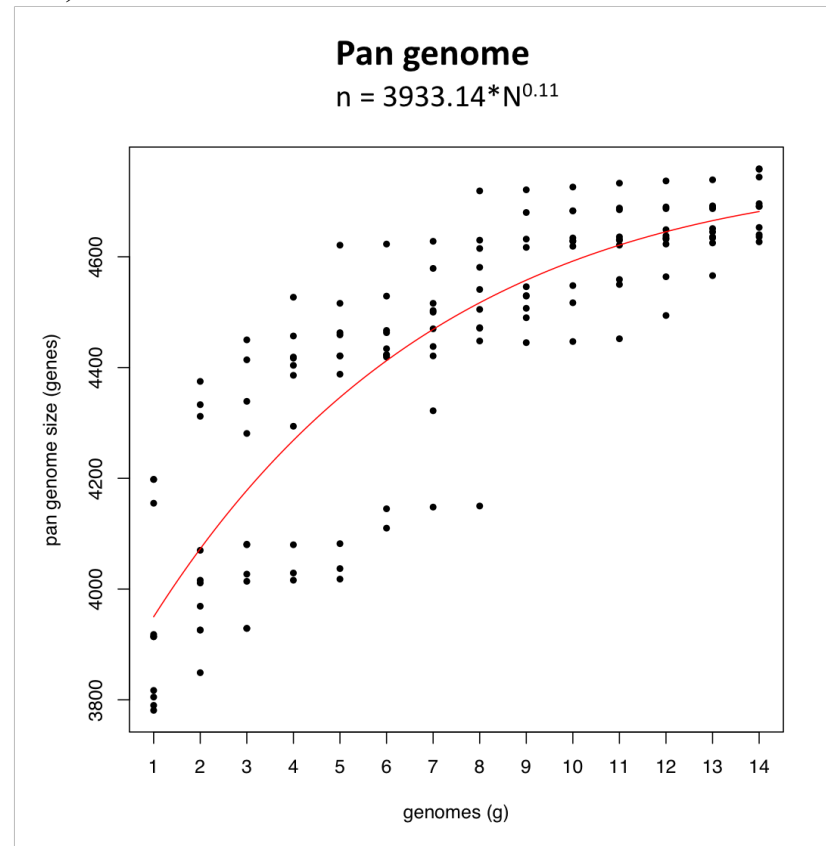

Supplement: 41598_2018_36254_MOESM1_ESM.pdf [file 41598_2018_36254_MOESM1_ESM.pdf]
